# Supplementary material
Source: Springer Nature journal article supplement (https://www.springermedizin.de/resource/supplementary/13075_2013_4221_MOESM3_ESM.pdf/9696378)
Supplement: MOESM3 [file 9696378]

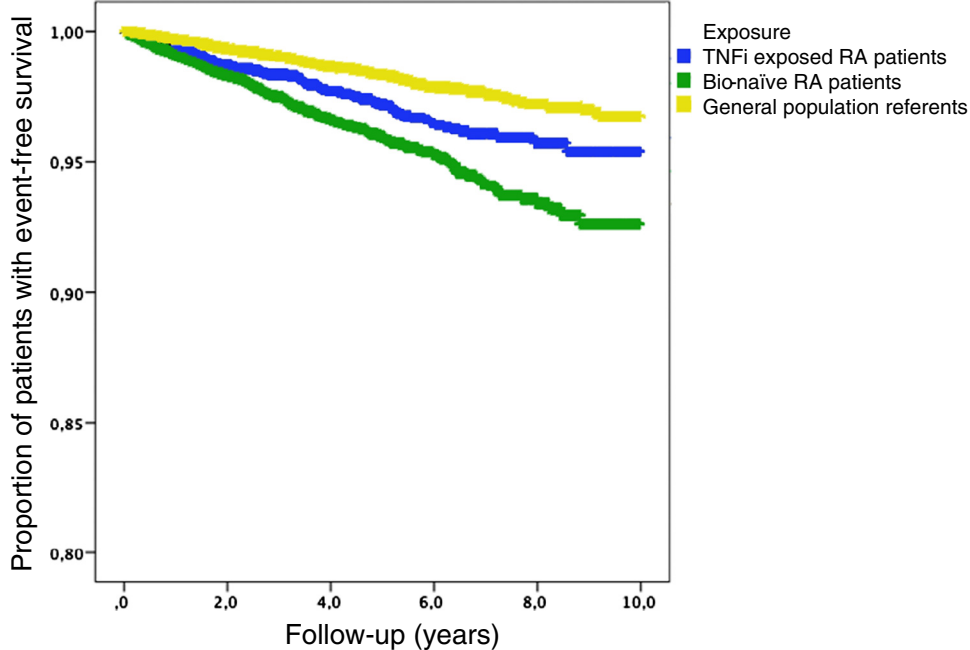

|                               | Start<br>Individuals<br>at risk | At 2 years follow-up<br>Individuals<br>at risk | Cumulative<br>ACS (n) | At 4 years follow-up<br>Individuals<br>at risk | Cumulative<br>ACS (n) | At 6 years follow-up<br>Individuals<br>at risk | Cumulative<br>ACS (n) | At 8 years follow-up<br>Individuals<br>at risk | Cumulative<br>ACS (n) |
|-------------------------------|---------------------------------|------------------------------------------------|-----------------------|------------------------------------------------|-----------------------|------------------------------------------------|-----------------------|------------------------------------------------|-----------------------|
| <b>TNFi</b>                   | 7,704                           | 4,214                                          | 74                    | 2,460                                          | 106                   | 1,325                                          | 129                   | 407                                            | 136                   |
| <b>Bio-naïve</b>              | 23,112                          | 10,044                                         | 269                   | 4,988                                          | 396                   | 2,286                                          | 445                   | 527                                            | 473                   |
| <b>General<br/>population</b> | 34,719                          | 18,825                                         | 167                   | 10,931                                         | 270                   | 5,776                                          | 332                   | 1,739                                          | 355                   |
